# Supplementary material
Source: HighWire-hosted journal article supplement (https://www.annals.org/content/suppl/2005/03/10/142.6.451)
Supplement: Safdar_AT_142-6-451-DC2-1.pdf [file Safdar_AT_142-6-451-DC2-1.pdf]

**Appendix Table. Features of the Included Studies\***

| Study, Year (Reference)        | Diagnostic Test Studied | Criteria for Positivity | Reference Standard Used                                                                           | Basis of Reference Standard | Study Design  | Patients/Catheters or Infectious Episodes, n/n | Sample                                                                | Rationale for Performance of Diagnostic Test      |
|--------------------------------|-------------------------|-------------------------|---------------------------------------------------------------------------------------------------|-----------------------------|---------------|------------------------------------------------|-----------------------------------------------------------------------|---------------------------------------------------|
| Maki et al., 1977 (25)         | Qualitative CSC         | Any growth              | Qualitative CSC and qualitative PBC                                                               | Catheter segment            | Prospective   | 250/250                                        | General inpatients                                                    | All catheters at removal                          |
| Maki et al., 1977 (64)         | Qualitative CSC         | Any growth              | Qualitative CSC and qualitative PBC                                                               | Catheter segment            | Prospective   | 6/50                                           | Patients with burns                                                   | All catheters at removal                          |
| Cleri et al., 1980 (26)        | Qualitative CSC         | Any growth              | Qualitative CSC and qualitative PBC                                                               | Catheter segment            | Prospective   | NR/149                                         | General inpatients                                                    | Suspected bloodstream infection                   |
| Jones et al., 1986 (56)        | Qualitative CSC         | Any growth              | Primary bloodstream infection†                                                                    | Blood culture               | Prospective   | NR/379                                         | Patients with cancer                                                  | All catheters at removal                          |
| Nahass et al., 1990 (57)       | Qualitative CSC         | Any growth              | Primary bloodstream infection†                                                                    | Blood culture               | Prospective   | 80/80                                          | Surgical patients                                                     | All patients                                      |
| Whitman and Boatman, 1995 (58) | Qualitative CSC         | Any growth              | Qualitative PBC and culture of catheter segment or reservoir material                             | Catheter segment            | Retrospective | 29/29                                          | Patients with cancer, sickle-cell disease, and HIV infection          | Suspected bloodstream infection                   |
| Maki et al., 1977 (25)         | Semi-quantitative CSC   | ≥15 CFU                 | Qualitative CSC and qualitative PBC                                                               | Catheter segment            | Prospective   | 250/250                                        | General inpatients                                                    | All catheters at removal                          |
| Maki et al., 1977 (64)         | Semi-quantitative CSC   | ≥15 CFU                 | Qualitative CSC and qualitative PBC                                                               | Catheter segment            | Prospective   | 6/50                                           | Patients with burns                                                   | All catheters at removal                          |
| Moyer et al., 1983 (70)        | Semi-quantitative CSC   | ≥15 CFU                 | Qualitative PBC and semi-quantitative CSC                                                         | Catheter segment            | Prospective   | 67/67                                          | Patients receiving total parenteral nutrition and patients with burns | All catheters at removal                          |
| Cooper and Hopkins, 1985 (59)  | Semi-quantitative CSC   | ≥15 CFU                 | Qualitative PBC and semi-quantitative CSC                                                         | Catheter segment            | Prospective   | 224/330                                        | Mostly patients in the ICU                                            | All catheters at removal                          |
| Collignon et al., 1986 (66)    | Semi-quantitative CSC   | ≥15 CFU                 | Qualitative PBC and semi-quantitative CSC                                                         | Catheter segment            | Prospective   | 440/780                                        | Patients in the ICU                                                   | All catheters at removal                          |
| Jones et al., 1986 (56)        | Semi-quantitative CSC   | ≥15 CFU                 | Primary bloodstream infection†                                                                    | Blood culture               | Prospective   | NR/379                                         | Patients with cancer                                                  | All catheters at removal                          |
| Collignon et al., 1987 (69)    | Semi-quantitative CSC   | ≥15 CFU                 | Primary bloodstream infection†                                                                    | Blood culture               | Prospective   | NR/322                                         | NR                                                                    | All catheters at removal                          |
| Rello et al., 1989 (72)        | Semi-quantitative CSC   | ≥15 CFU                 | Qualitative PBC and semi-quantitative CSC or quantitative CSC                                     | Catheter segment            | Prospective   | 41/50                                          | Patients with end-stage renal disease                                 | All catheters at removal                          |
| Cercenado et al., 1990 (61)    | Semi-quantitative CSC   | ≥15 CFU                 | Qualitative PBC and semi-quantitative CSC                                                         | Catheter segment            | Prospective   | NR/139                                         | General inpatients                                                    | All catheters at removal                          |
| Rello et al., 1991 (62)        | Semi-quantitative CSC   | ≥15 CFU                 | Primary bloodstream infection†                                                                    | Blood culture               | Prospective   | 49/91                                          | General inpatients                                                    | Suspected bloodstream infection                   |
| Aufwerber et al., 1991 (63)    | Semi-quantitative CSC   | ≥15 CFU                 | Qualitative CSC and qualitative PBC                                                               | Catheter segment            | Retrospective | 453/542                                        | Patients in the ICU                                                   | All catheters at removal                          |
| Raad et al., 1992 (65)         | Semi-quantitative CSC   | ≥15 CFU                 | Catheter segment culture and qualitative PBC; clinical signs and symptoms of infection            | Catheter segment            | Prospective   | 153/313                                        | General inpatients                                                    | All catheters at removal                          |
| Widmer et al., 1992 (67)       | Semi-quantitative CSC   | ≥15 CFU                 | Qualitative PBC and semi-quantitative CSC                                                         | Catheter segment            | Prospective   | NR/157                                         | Patients in the ICU                                                   | All catheters at removal                          |
| Gutierrez et al., 1992 (60)    | Semi-quantitative CSC   | ≥15 CFU                 | Semi-quantitative CSC or quantitative CSC and qualitative PBC                                     | Catheter segment            | Prospective   | NR/98                                          | General inpatients                                                    | Suspected bloodstream infection                   |
| Maki et al., 1996 (68)         | Semi-quantitative CSC   | ≥15 CFU                 | Culture isolates of hub, infusate, or catheter segment and bloodstream infection by DNA subtyping | Blood culture               | Prospective   | NR/400                                         | General inpatients                                                    | All catheters at removal                          |
| Kite et al., 1997 (32)         | Semi-quantitative CSC   | ≥15 CFU                 | Qualitative PBC and quantitative CSC or semi-quantitative CSC                                     | Catheter segment            | Prospective   | 216/230                                        | Surgical patients in the ICU                                          | All catheters and suspected bloodstream infection |
| Kite et al., 1999 (37)         | Semi-quantitative CSC   | ≥15 CFU                 | Quantitative PBC and semi-quantitative CSC or quantitative CSC                                    | Catheter segment            | Prospective   | NR/112                                         | Surgical patients                                                     | Suspected bloodstream infection                   |
| Snydman et al., 1982 (29)      | Semi-quantitative CSC   | ≥15 CFU                 | Qualitative PBC and Qualitative CSC                                                               | Catheter segment            | Prospective   | 100/69                                         | Patients receiving total parenteral nutrition                         | All patients                                      |

Appendix Table—Continued

| Study, Year (Reference)        | Diagnostic Test Studied                      | Criteria for Positivity                                                       | Reference Standard Used                                                                                                                                                                | Basis of Reference Standard | Study Design                  | Patients/Catheters or Infectious Episodes, n/n | Sample                                                       | Rationale for Performance of Diagnostic Test      |
|--------------------------------|----------------------------------------------|-------------------------------------------------------------------------------|----------------------------------------------------------------------------------------------------------------------------------------------------------------------------------------|-----------------------------|-------------------------------|------------------------------------------------|--------------------------------------------------------------|---------------------------------------------------|
| Widmer et al., 2003 (71)       | Semi-quantitative CSC                        | ≥15 CFU                                                                       | Semi-quantitative CSC or quantitative CSC and qualitative PBC                                                                                                                          | Catheter segment            | Prospective                   | NR/1000                                        | NR                                                           | All catheters at removal                          |
| Rello et al., 1989 (72)        | Quantitative CSC                             | ≥1000 CFU                                                                     | Qualitative PBC and semi-quantitative CSC or quantitative CSC                                                                                                                          | Catheter segment            | Prospective                   | 41/50                                          | Patients with end-stage renal disease                        | All catheters at removal                          |
| Cleri et al., 1980 (26)        | Quantitative CSC                             | ≥1000 CFU                                                                     | Qualitative CSC and qualitative PBC                                                                                                                                                    | Catheter segment            | Prospective                   | NR/149                                         | General inpatients                                           | Suspected bloodstream infection                   |
| Brun-Buisson et al., 1987 (27) | Quantitative CSC                             | ≥1000 CFU                                                                     | Qualitative PBC and qualitative CSC; no other focus of infection                                                                                                                       | Catheter segment            | Prospective                   | 231/331                                        | Patients in the ICU                                          | All catheters at removal                          |
| Rello et al., 1991 (62)        | Quantitative CSC                             | ≥1000 CFU                                                                     | Primary bloodstream infection                                                                                                                                                          | Blood culture               | Prospective                   | 49/91                                          | General inpatients                                           | Suspected bloodstream infection                   |
| Kite et al., 1999 (37)         | Quantitative CSC                             | ≥1000 CFU                                                                     | Quantitative PBC and semi-quantitative CSC or quantitative CSC                                                                                                                         | Catheter segment            | Prospective                   | NR/112                                         | Surgical patients                                            | Suspected bloodstream infection                   |
| Gutierrez et al., 1992 (60)    | Quantitative CSC                             | ≥1000 CFU                                                                     | Semi-quantitative CSC or quantitative PBC and qualitative PBC                                                                                                                          | Catheter segment            | Prospective                   | NR/98                                          | General inpatients                                           | Suspected bloodstream infection                   |
| Kite et al., 1997 (52)         | Quantitative CSC                             | ≥1000 CFU                                                                     | Qualitative PBC and quantitative PBC                                                                                                                                                   | Catheter segment            | Prospective                   | NR/228                                         | Surgical patients in the ICU                                 | All catheters and suspected bloodstream infection |
| Sherertz et al., 1990 (28)     | Quantitative CSC                             | ≥1000 CFU                                                                     | Qualitative PBC and semi-quantitative CSC                                                                                                                                              | Catheter segment            | Retrospective                 | 104/216                                        | Mostly patients in the ICU                                   | Suspected bloodstream infection                   |
| Raad et al., 1992 (65)         | Quantitative CSC                             | ≥1000 CFU                                                                     | Catheter segment culture, qualitative PBC, and clinical symptoms and signs of infection                                                                                                | Catheter segment            | Prospective                   | 153/313                                        | General inpatients                                           | All catheters at removal                          |
| Maki et al., 1996 (68)         | Quantitative CSC                             | ≥1000 CFU                                                                     | Culture isolates of hub, infusate, or catheter segment and bloodstream infection concordant by DNA subtyping                                                                           | Blood culture               | Prospective                   | NR/400                                         | General inpatients                                           | All catheters at removal                          |
| Kelly et al., 1996 (73)        | Quantitative CSC                             | ≥1000 CFU                                                                     | Qualitative PBC and qualitative CSC                                                                                                                                                    | Catheter segment            | Retrospective and prospective | NR/405                                         | General inpatients                                           | All catheters at removal                          |
| Douard et al., 1999 (32)       | Quantitative catheter septum and tip culture | >4-fold increase in growth from catheter blood compared with peripheral blood | No other focus of infection, and 1) purulence at the insertion site with positive exudates and PBCs or 2) signs and symptoms of sepsis with positive quantitative CSC and positive PBC | Catheter segment            | Prospective                   | 170/170                                        | Immuno-compromised patients                                  | All catheters at removal                          |
| Bjornson et al., 1982 (75)     | Quantitative CSC                             | ≥1000 CFU                                                                     | Qualitative PBC and CSC                                                                                                                                                                | Catheter segment            | Prospective                   | 53/74                                          | Patients receiving total parenteral nutrition                | All catheters at removal                          |
| Widmer et al., 2003 (71)       | Quantitative CSC                             | ≥1000 CFU                                                                     | Semi-quantitative CSC or quantitative CSC and qualitative PBC                                                                                                                          | Catheter segment            | Prospective                   | NR/1000                                        | NR                                                           | All catheters at removal                          |
| Snydman et al., 1982 (29)      | IVD-drawn qualitative blood culture          | Any growth                                                                    | Qualitative PBC and Qualitative CSC                                                                                                                                                    | Catheter segment            | Prospective                   | 100/69                                         | Patients receiving total parenteral nutrition                | All patients                                      |
| Bozzetti et al., 1984 (76)     | IVD-drawn qualitative blood culture          | Any growth                                                                    | Semi-quantitative CSC and qualitative PBC                                                                                                                                              | Catheter segment            | Prospective                   | 64/256                                         | Patients with cancer                                         | All patients                                      |
| Paya et al., 1989 (77)         | IVD-drawn qualitative blood culture          | Any growth                                                                    | Qualitative PBC and semi-quantitative CSC                                                                                                                                              | Catheter segment            | Prospective                   | 44/52                                          | Surgical patients in the ICU                                 | Suspected bloodstream infection                   |
| Whitman and Boatman, 1995 (48) | IVD-drawn qualitative blood culture          | Any growth                                                                    | Semi-quantitative CSC and qualitative PBC                                                                                                                                              | Catheter segment            | Retrospective                 | 29/29                                          | Patients with cancer, sickle-cell disease, and HIV infection | Suspected bloodstream infection                   |
| Raucher et al., 1984 (78)      | IVD-drawn qualitative blood culture          | >5:1                                                                          | Peripheral qualitative blood culture and catheter blood culture                                                                                                                        | Blood culture               | Prospective                   | 28/30                                          | Children                                                     | Suspected bloodstream infection                   |

Appendix Table—Continued

| Study, Year (Reference)         | Diagnostic Test Studied                                 | Criteria for Positivity                                          | Reference Standard Used                                                                                  | Basis of Reference Standard | Study Design  | Patients/Catheters or Infectious Episodes, n/n | Sample                                                                | Rationale for Performance of Diagnostic Test |
|---------------------------------|---------------------------------------------------------|------------------------------------------------------------------|----------------------------------------------------------------------------------------------------------|-----------------------------|---------------|------------------------------------------------|-----------------------------------------------------------------------|----------------------------------------------|
| Capdevila et al., 1992 (31)     | IVD-drawn qualitative blood culture                     | Any growth                                                       | Qualitative PBC and semi-quantitative CSC; no other source; recovery after catheter removal              | Catheter segment            | Prospective   | 64/107                                         | NR                                                                    | Suspected bloodstream infection              |
| Moyer et al., 1983 (70)         | IVD-drawn qualitative blood culture                     | Any growth                                                       | Qualitative PBC and semi-quantitative CSC                                                                | Catheter segment            | Prospective   | 67/67                                          | Patients receiving total parenteral nutrition and patients with burns | All catheters at removal                     |
| Paya et al., 1989 (77)          | IVD-drawn quantitative blood culture                    | Any growth                                                       | Qualitative PBC and semi-quantitative CSC                                                                | Catheter segment            | Prospective   | 44/52                                          | Surgical patients in the ICU                                          | Suspected bloodstream infection              |
| Snydman et al., 1982 (29)       | IVD-drawn quantitative blood culture                    | >15 CFU                                                          | Qualitative PBC and qualitative CSC                                                                      | Catheter segment            | Prospective   | 100/69                                         | Patients receiving total parenteral nutrition                         | All patients                                 |
| Raucher et al., 1984 (78)       | IVD-drawn quantitative blood culture                    | >5:1                                                             | Qualitative PBC and catheter blood culture                                                               | Blood culture               | Prospective   | 28/30                                          | Children                                                              | Suspected bloodstream infection              |
| Capdevila et al., 1992 (31)     | IVD-drawn quantitative blood culture                    | >100 CFU                                                         | Qualitative PBC and semi-quantitative CSC; no other source; recovery after catheter removal              | Catheter segment            | Prospective   | 64/107                                         | NR                                                                    | Suspected bloodstream infection              |
| Moyer et al., 1983 (70)         | IVD-drawn quantitative blood culture                    | ≥25 CFU                                                          | Qualitative PBC and semi-quantitative CSC                                                                | Catheter segment            | Prospective   | 67/67                                          | Patients receiving total parenteral nutrition and patients with burns | All catheters at removal                     |
| Franklin et al., 2004 (91)      | IVD-drawn quantitative blood culture                    | ≥100 CFU                                                         | Paired quantitative blood culture                                                                        | Blood culture               | Retrospective | 241/241                                        | Children with cancer                                                  | Suspected bloodstream infection              |
| Catton et al., 2002 (94)        | IVD-drawn quantitative blood culture                    | >100 CFU                                                         | Qualitative PBC and semi-quantitative CSC                                                                | Catheter segment            | Prospective   | 205/205                                        | Surgical patients                                                     | Suspected bloodstream infection              |
| Flynn et al., 1988 (34)         | Paired lysis–centrifugation± quantitative blood culture | >5-fold increase in growth from catheter compared with periphery | Qualitative PBC and qualitative catheter blood culture                                                   | Blood culture               | Prospective   | 13/13                                          | Children                                                              | Suspected bloodstream infection              |
| Sanchez-Conde et al., 2003 (79) | Paired lysis–centrifugation± quantitative blood culture | >5-fold increase in growth from catheter compared with periphery | Qualitative PBC and CSC                                                                                  | Catheter segment            | Prospective   | 145/145                                        | Adults                                                                | Suspected bloodstream infection              |
| Douard et al., 1991 (74)        | Paired quantitative blood culture                       | >5-fold                                                          | Positive paired quantitative blood cultures                                                              | Blood culture               | Prospective   | NR/53                                          | Children with hematologic or oncologic illness                        | Suspected bloodstream infection              |
| Douard et al., 1994 (33)        | Paired quantitative blood culture                       | >3:1                                                             | Positive PBC and CSCs                                                                                    | Catheter segment            | Prospective   | 58/58                                          | Medical and surgical patients in the ICU                              | Suspected bloodstream infection              |
| Mosca et al., 1987 (80)         | Paired lysis–centrifugation± quantitative blood culture | >5-fold                                                          | Clinical follow-up                                                                                       | Other                       | Prospective   | 25/26                                          | General inpatients                                                    | Suspected bloodstream infection              |
| Paya et al., 1989 (77)          | Paired lysis–centrifugation± quantitative blood culture | >30 CFU compared with peripheral sample                          | Qualitative PBC and semi-quantitative CSC                                                                | Catheter segment            | Prospective   | 44/52                                          | Surgical patients in the ICU                                          | Suspected bloodstream infection              |
| Fortun et al., 2000 (81)        | Paired lysis–centrifugation± quantitative blood culture | >5:1                                                             | Qualitative PBC and semi-quantitative CSC                                                                | Catheter segment            | Prospective   | NR/118                                         | General inpatients                                                    | All catheters at removal                     |
| Capdevila et al., 1992 (31)     | Paired quantitative blood culture                       | >4:1                                                             | Qualitative PBC and semi-quantitative CSC; no other source of infection; recovery after catheter removal | Catheter segment            | Prospective   | 64/107                                         | Patients in the ICU                                                   | Suspected bloodstream infection              |
| Raucher et al., 1984 (78)       | Paired quantitative blood culture                       | >5:1                                                             | Qualitative PBC and catheter blood culture                                                               | Blood culture               | Prospective   | 28/30                                          | Children                                                              | Suspected bloodstream infection              |

Appendix Table—Continued

| Study, Year (Reference)         | Diagnostic Test Studied                                 | Criteria for Positivity                                                                     | Reference Standard Used                                                                                                                                                                | Basis of Reference Standard | Study Design  | Patients/Catheters or Infectious Episodes, n/n | Sample                                   | Rationale for Performance of Diagnostic Test                                                                                |
|---------------------------------|---------------------------------------------------------|---------------------------------------------------------------------------------------------|----------------------------------------------------------------------------------------------------------------------------------------------------------------------------------------|-----------------------------|---------------|------------------------------------------------|------------------------------------------|-----------------------------------------------------------------------------------------------------------------------------|
| Douard et al., 1999 (32)        | Paired lysis–centrifugation† quantitative blood culture | >4-fold increase in growth from catheter-drawn blood compared with peripherally drawn blood | No other focus of infection, and 1) purulence at the insertion site with positive exudates and PBCs or 2) signs and symptoms of sepsis with positive quantitative CSC and positive PBC | Catheter segment            | Prospective   | 170/170                                        | Immuno-compromised patients              | All catheters at removal                                                                                                    |
| Blot et al., 1999 (35)          | Differential time to positivity                         | >2 h                                                                                        | Qualitative PBC and quantitative CSC                                                                                                                                                   | Catheter segment            | Prospective   | 87/93§                                         | General inpatients                       | Suspected bloodstream infection                                                                                             |
| Malgrange et al., 2001 (83)     | Differential time to positivity                         | >2 h                                                                                        | Qualitative PBC and quantitative CSC                                                                                                                                                   | Catheter segment            | Prospective   | NR/98§                                         | Patients with cancer                     | Suspected bloodstream infection                                                                                             |
| Rjinders et al., 2001 (84)      | Differential time to positivity                         | >2 h                                                                                        | Qualitative PBC and quantitative CSC                                                                                                                                                   | Catheter segment            | Prospective   | 10/10                                          | Medical and surgical patients in the ICU | Suspected bloodstream infection                                                                                             |
| Blot et al., 1998 (82)          | Differential time to positivity                         | >2 h                                                                                        | Qualitative PBC and quantitative CSC                                                                                                                                                   | Catheter segment            | Retrospective | NR/42§                                         | General inpatients                       | Suspected bloodstream infection                                                                                             |
| Gaur et al., 2002 (89)          | Differential time to positivity                         | >2 h                                                                                        | Paired quantitative blood culture                                                                                                                                                      | Blood culture               | Prospective   | NR/28§                                         | Children with cancer                     | Suspected bloodstream infection                                                                                             |
| Mermel et al., 1998 (85)        | Differential time to positivity                         | >2 h                                                                                        | Clinical definition                                                                                                                                                                    | Other                       | Retrospective | 36/31                                          | General inpatients                       | Suspected bloodstream infection                                                                                             |
| Raad et al., (90)               | Differential time to positivity                         | >2 h                                                                                        | No other focus of infection; signs and symptoms; and semi-quantitative catheter tip culture with PBC or paired quantitative blood culture, or both                                     | Blood culture               | Prospective   | 201/191                                        | Adults with cancer                       | Suspected bloodstream infection                                                                                             |
| Seifert et al., 2003 (36)       | Differential time to positivity                         | >2 h                                                                                        | Paired quantitative blood culture, DNA subtyping, and quantitative CSC                                                                                                                 | Blood culture               | Prospective   | 51/51                                          | Patients with neutropenia                | Suspected bloodstream infection                                                                                             |
| Sanchez-Conde et al., 2003 (79) | Differential time to positivity                         | >2 h                                                                                        | Qualitative PBC and quantitative CSC                                                                                                                                                   | Blood culture               | Prospective   | 145/145                                        | Adults                                   | Suspected bloodstream infection                                                                                             |
| Rushforth et al., 1993 (86)     | Acridine orange leukocyte cytopsin                      | Any growth                                                                                  | Paired quantitative blood culture                                                                                                                                                      | Blood culture               | Prospective   | 51/95§                                         | Infants                                  | Suspected bloodstream infection                                                                                             |
| von Baum et al., 1998 (87)      | Acridine orange leukocyte cytopsin                      | Any growth                                                                                  | Semi-quantitative CSC and qualitative PBC                                                                                                                                              | Catheter segment            | Prospective   | 14/14                                          | Adults in the ICU                        | Random sampling of both suspected bloodstream infection and not bloodstream infection; data obtained from subgroup analysis |
| Kite et al., 1999 (40)          | Acridine orange leukocyte cytopsin                      | Any growth                                                                                  | Quantitative PBC and semi-quantitative CSC or quantitative CSC                                                                                                                         | Catheter segment            | Prospective   | NR/112                                         | Surgical patients                        | Suspected bloodstream infection                                                                                             |
| Tighe et al., 1996 (36)         | Acridine orange leukocyte cytopsin                      | Any growth                                                                                  | Semi-quantitative CSC and qualitative PBC                                                                                                                                              | Catheter segment            | Prospective   | 50/50                                          | General inpatients                       | Suspected bloodstream infection                                                                                             |
| Bong et al., 2003 (87)          | Acridine orange leukocyte cytopsin                      | Any growth                                                                                  | Semi-quantitative CSC and qualitative PBC                                                                                                                                              | Catheter segment            | Prospective   | 50/50                                          | Surgical patients                        | Suspected bloodstream infection                                                                                             |

\* CFU = colony-forming units; CSC = catheter segment culture; ICU = intensive care unit; IVD = intravascular device; NR = not reported; PBC = peripheral blood culture.

† Presence of bacteremia while the catheter is in place and no other probable source of bacteremia.

‡ Isolator system (Wampole Laboratories, Cranbury, New Jersey).

§ Infectious episodes.
