# Supplementary material
Source: HighWire-hosted journal article supplement (https://www.annals.org/content/suppl/2005/03/10/142.6.451)
Supplement: Safdar_T2_142-6-451-DC1-1.pdf [file Safdar_T2_142-6-451-DC1-1.pdf]

**Table 2. Summary Data for Studies Included in the Meta-Analysis**

| Study, Year (Reference)        | Diagnostic Technique                       | Duration of Catheterization | Prevalence, % | Test Results, <i>n</i> |                |               |                |
|--------------------------------|--------------------------------------------|-----------------------------|---------------|------------------------|----------------|---------------|----------------|
|                                |                                            |                             |               | True-Positive          | False-Positive | True-Negative | False-Negative |
| Maki et al., 1977 (64)         | Qualitative catheter segment culture       | Short term                  | 10            | 5                      | 21             | 24            | 0              |
| Maki et al., 1977 (25)         | Qualitative catheter segment culture       | Short term                  | 1.6           | 4                      | 37             | 209           | 0              |
| Cleri et al., 1980 (26)        | Qualitative catheter segment culture       | Short term                  | 9.3           | 13                     | 33             | 103           | 0              |
| Jones et al., 1986 (56)        | Qualitative catheter segment culture       | Short and long term         | 3.1           | 12                     | 99             | 268           | 0              |
| Nahass et al., 1990 (57)       | Qualitative catheter segment culture       | Short term                  | 8.7           | 5                      | 25             | 48            | 2              |
| Whitman and Boatman, 1995 (58) | Qualitative catheter segment culture       | Long term                   | 65.5          | 13                     | 2              | 8             | 6              |
| Cooper and Hopkins, 1985 (59)  | Semi-quantitative catheter segment culture | Short term                  | 3.6           | 12                     | 29             | 289           | 0              |
| Gutierrez et al., 1992 (60)    | Semi-quantitative catheter segment culture | Short term                  | 12.2          | 10                     | 14             | 72            | 2              |
| Cercenado et al., 1990 (61)    | Semi-quantitative catheter segment culture | Short term                  | 12.9          | 17                     | 36             | 85            | 1              |
| Rello et al., 1991 (92)        | Semi-quantitative catheter segment culture | Short term                  | 13.2          | 13                     | 18             | 67            | 0              |
| Maki et al., 1977 (25)         | Semi-quantitative catheter segment culture | Short term                  | 1.6           | 4                      | 21             | 225           | 0              |
| Aufwerber et al., 1991 (63)    | Semi-quantitative catheter segment culture | Short term                  | 3.1           | 15                     | 122            | 403           | 2              |
| Kite et al., 1999 (37)         | Semi-quantitative catheter segment culture | Short and long term         | 44.6          | 45                     | 28             | 34            | 5              |
| Kite et al., 1997 (52)         | Semi-quantitative catheter segment culture | Short term                  | 9.8           | 18                     | 69             | 133           | 4              |
| Maki et al., 1977 (64)         | Semi-quantitative catheter segment culture | Short term                  | 10.0          | 5                      | 11             | 34            | 0              |
| Raad et al., 1992 (65)         | Semi-quantitative catheter segment culture | Short term                  | 13.2          | 8                      | 15             | 96            | 9              |
| Snydman et al., 1982 (29)      | Semi-quantitative catheter segment culture | NR                          | 6.6           | 5                      | 7              | 63            | 0              |
| Collignon et al., 1986 (66)    | Semi-quantitative catheter segment culture | Short term                  | 1.7           | 11                     | 122            | 610           | 2              |
| Widmer et al., 1992 (67)       | Semi-quantitative catheter segment culture | Short term                  | 3.8           | 5                      | 6              | 145           | 1              |
| Jones et al., 1986 (56)        | Semi-quantitative catheter segment culture | Short and long term         | 3.1           | 7                      | 25             | 342           | 5              |
| Maki et al., 1996 (68)         | Semi-quantitative catheter segment culture | Short term                  | 2.7           | 10                     | 93             | 296           | 1              |
| Collignon et al., 1987 (93)    | Semi-quantitative catheter segment culture | Short and long term         | 3.1           | 5                      | 41             | 271           | 5              |
| Moyer et al., 1983 (70)        | Semi-quantitative catheter segment culture | Short term                  | 6.8           | 5                      | 15             | 53            | 0              |
| Widmer et al., 2003 (71)       | Semi-quantitative catheter segment culture | Short term                  | 6.8           | 55                     | 19             | 913           | 13             |
| Rello et al., 1989 (92)        | Semi-quantitative catheter segment culture | Long term                   | 16.0          | 6                      | 12             | 30            | 2              |
| Widmer et al., 2003 (71)       | Quantitative catheter segment culture      | Short term                  | 6.8           | 42                     | 19             | 913           | 26             |
| Rello et al., 1989 (92)        | Quantitative catheter segment culture      | Long term                   | 16.0          | 5                      | 5              | 37            | 3              |
| Cleri et al., 1980 (26)        | Quantitative catheter segment culture      | Short term                  | 8.7           | 13                     | 11             | 125           | 0              |
| Brun-Buisson et al., 1987 (27) | Quantitative catheter segment culture      | Short term                  | 6.0           | 20                     | 24             | 287           | 0              |
| Rello et al., 1991 (62)        | Quantitative catheter segment culture      | Short term                  | 13.2          | 7                      | 13             | 72            | 6              |
| Kite et al., 1999 (37)         | Quantitative catheter segment culture      | Short term                  | 44.6          | 48                     | 15             | 47            | 2              |
| Gutierrez et al., 1992 (60)    | Quantitative catheter segment culture      | Short term                  | 12.2          | 11                     | 14             | 72            | 1              |
| Kite et al., 1997 (52)         | Quantitative catheter segment culture      | Short term                  | 9.0           | 15                     | 32             | 170           | 5              |
| Sherertz et al., 1990 (28)     | Quantitative catheter segment culture      | Short term                  | 70.1          | 68                     | 5              | 11            | 13             |
| Raad et al., 1992 (65)         | Quantitative catheter segment culture      | Short term                  | 15.3          | 13                     | 5              | 72            | 1              |

*Table continued*

Table 2—Continued (top right)

| Sensitivity,<br>% | Specificity,<br>% | Positive<br>Predictive<br>Value,<br>% | Negative<br>Predictive<br>Value,<br>% | Indeterminate<br>Test Results,<br>n/nt |
|-------------------|-------------------|---------------------------------------|---------------------------------------|----------------------------------------|
| 100               | 53                | 19                                    | 100                                   | NR                                     |
| 100               | 85                | 9                                     | 100                                   | NR                                     |
| 100               | 76                | 28                                    | 100                                   | NR                                     |
| 100               | 73                | 10                                    | 100                                   | NR                                     |
| 71                | 66                | 17                                    | 96                                    | NR                                     |
| 68                | 80                | 86                                    | 57                                    | NR                                     |
| 100               | 91                | 29                                    | 100                                   | NR                                     |
| 83                | 84                | 41                                    | 97                                    | NR                                     |
| 94                | 70                | 32                                    | 98                                    | 0                                      |
| 100               | 79                | 41                                    | 100                                   | NR                                     |
| 100               | 91                | 16                                    | 100                                   | NR                                     |
| 88                | 77                | 10                                    | 99                                    | NR                                     |
| 90                | 55                | 62                                    | 87                                    | NR                                     |
| 82                | 66                | 21                                    | 97                                    | NR                                     |
| 100               | 76                | 31                                    | 100                                   | NR                                     |
| 47                | 86                | 35                                    | 91                                    | NR                                     |
| 100               | 90                | 41                                    | 100                                   | NR                                     |
| 85                | 83                | 8                                     | 99                                    | NR                                     |
| 83                | 96                | 45                                    | 96                                    | NR                                     |
| 58                | 93                | 21                                    | 93                                    | NR                                     |
| 91                | 76                | 9                                     | 99                                    | NR                                     |
| 50                | 87                | 10                                    | 98                                    | NR                                     |
| 100               | 78                | 25                                    | 100                                   | NR                                     |
| 81                | 98                | 74                                    | 99                                    | NR                                     |
| 75                | 71                | 33                                    | 93                                    | NR                                     |
| 62                | 98                | 69                                    | 99                                    | NR                                     |
| 63                | 88                | 50                                    | 92                                    | NR                                     |
| 100               | 92                | 54                                    | 100                                   | NR                                     |
| 100               | 92                | 45                                    | 100                                   | 0                                      |
| 54                | 85                | 35                                    | 92                                    | NR                                     |
| 96                | 76                | 76                                    | 95                                    | NR                                     |
| 92                | 84                | 44                                    | 98                                    | NR                                     |
| 75                | 84                | 32                                    | 97                                    | NR                                     |
| 84                | 69                | 93                                    | 45                                    | NR                                     |
| 93                | 94                | 72                                    | 99                                    | NR                                     |

Table 2—Continued (bottom left)

| Study, Year (Reference)        | Diagnostic Technique                                     | Duration of Catheterization | Prevalence, % | Test Results, <i>n</i> |                |               |                |
|--------------------------------|----------------------------------------------------------|-----------------------------|---------------|------------------------|----------------|---------------|----------------|
|                                |                                                          |                             |               | True-Positive          | False-Positive | True-Negative | False-Negative |
| Maki et al., 1996 (68)         | Quantitative catheter segment culture                    | Short term                  | 2.7           | 8                      | 66             | 323           | 3              |
| Kelly et al., 1996 (73)        | Quantitative catheter segment culture                    | Short term                  | 3.4           | 13                     | 98             | 293           | 1              |
| Douard et al., 1999 (32)       | Quantitative catheter septum culture                     | Long term                   | 8.8           | 14                     | 0              | 155           | 1              |
| Bjornson et al., 1982 (75)     | Quantitative catheter segment culture                    | Short and long term         | 13.5          | 8                      | 4              | 60            | 2              |
| Snydman et al., 1982 (29)      | IVD-drawn qualitative blood culture                      | NR                          | 0.05          | 2                      | 8              | 87            | 3              |
| Bozzetti et al., 1985 (76)     | IVD-drawn qualitative blood culture                      | Short term                  | 3.1           | 7                      | 35             | 213           | 1              |
| Paya et al., 1989 (77)         | IVD-drawn qualitative blood culture                      | Short term                  | 28.8          | 15                     | 12             | 25            | 0              |
| Whitman and Boatman, 1995 (58) | IVD-drawn qualitative blood culture                      | Long term                   | 65.5          | 16                     | 3              | 7             | 3              |
| Raucher et al., 1984 (78)      | IVD-drawn qualitative blood culture                      | Long term                   | 6.5           | 9                      | 21             | 107           | 0              |
| Capdevila et al., 1992 (31)    | IVD-drawn qualitative blood culture                      | Short term                  | 15.8          | 17                     | 10             | 80            | 0              |
| Moyer et al., 1983 (70)        | IVD-drawn qualitative blood culture                      | Short term                  | 6.0           | 4                      | 5              | 58            | 0              |
| Paya et al., 1989 (77)         | IVD-drawn quantitative blood culture                     | Short term                  | 28.8          | 12                     | 6              | 31            | 3              |
| Snydman et al., 1982 (29)      | IVD-drawn quantitative blood culture                     | NR                          | 0.05          | 1                      | 5              | 90            | 4              |
| Raucher et al., 1984 (78)      | IVD-drawn quantitative blood culture                     | Long term                   | 6.5           | 9                      | 5              | 123           | 0              |
| Capdevila et al., 1992 (31)    | IVD-drawn quantitative blood culture                     | Short term                  | 15.8          | 14                     | 1              | 89            | 3              |
| Moyer et al., 1983 (70)        | IVD-drawn quantitative blood culture                     | Short term                  | 7.4           | 4                      | 0              | 62            | 1              |
| Franklin et al., 2004 (91)     | IVD-drawn quantitative blood culture                     | Long term                   | 58.0          | 111                    | 36             | 65            | 29             |
| Catton et al., 2002 (94)       | IVD-drawn quantitative blood culture                     | Long term                   | 40.4          | 80                     | 11             | 111           | 3              |
| Flynn et al., 1988 (34)        | Paired Lysis-centrifugation‡ quantitative blood cultures | Long term                   | 61.5          | 7                      | 0              | 5             | 0              |
| Sanchez-Conde, 2003 (79)       | Paired Lysis-centrifugation‡ quantitative blood cultures | Short term                  | 73.6          | 106                    | 1              | 51            | 39             |
| Douard et al., 1991 (74)       | Paired Lysis-centrifugation‡ quantitative blood cultures | Long term                   | 13.2          | 7                      | 0              | 46            | 0              |
| Douard et al., 1994 (33)       | Paired Lysis-centrifugation‡ quantitative blood cultures | Short and long term         | 62.0          | 30                     | 0              | 22            | 6              |
| Mosca et al., 1987 (80)        | Paired Lysis-centrifugation‡ quantitative blood cultures | Long term                   | 30.7          | 8                      | 0              | 18            | 0              |
| Paya et al., 1989 (77)         | Paired Lysis-centrifugation‡ quantitative blood cultures | Short term                  | 28.8          | 7                      | 4              | 33            | 8              |
| Fortun et al., 2000 (81)       | Paired Lysis-centrifugation‡ quantitative blood cultures | Short term                  | 18.6          | 21                     | 3              | 93            | 1              |
| Capdevila et al., 1992 (31)    | Paired quantitative blood cultures                       | Short term                  | 15.8          | 16                     | 0              | 90            | 1              |
| Raucher et al., 1984 (78)      | Paired quantitative blood cultures                       | Long term                   | 19.2          | 5                      | 0              | 21            | 0              |
| Douard et al., 1999 (32)       | Paired Lysis-centrifugation‡ quantitative blood cultures | Long term                   | 8.8           | 12                     | 0              | 155           | 3              |
| Blot et al., 1999 (35)         | Differential time to positivity                          | Short and long term         | 19.7          | 16                     | 1              | 68            | 1              |
| Malgrange et al., 2001 (83)    | Differential time to positivity                          | Long term                   | 35.7          | 27                     | 29             | 34            | 8              |
| Sanchez-Conde, 2003 (79)       | Differential time to positivity                          | Short term                  | 73.6          | 135                    | 5              | 47            | 10             |
| Rjinders et al., 2001 (84)     | Differential time to positivity                          | Short term                  | 30.0          | 2                      | 4              | 3             | 1              |
| Blot et al., 1998 (82)         | Differential time to positivity                          | Long term                   | 66.6          | 27                     | 0              | 14            | 1              |
| Gaur et al., 2002 (89)         | Differential time to positivity                          | Long term                   | 28.5          | 8                      | 0              | 24            | 1              |
| Mermel et al., 1998 (85)       | Differential time to positivity                          | NR                          | 46.8          | 11                     | 5              | 12            | 4              |
| Raad et al., 2004 (90)         | Differential time to positivity                          | Short term*                 | 48.0          | 29                     | 3              | 36            | 7              |
| Raad et al., 2004 (90)         | Differential time to positivity                          | Long term                   | 62.0          | 67                     | 11             | 33            | 5              |
| Seifert et al., 2003 (36)      | Differential time to positivity                          | Short term                  | 43.1          | 18                     | 4              | 25            | 4              |
| Rushforth et al., 1993 (86)    | Acridine orange leukocyte cytospin                       | Long term                   | 32.6          | 27                     | 4              | 60            | 4              |
| Tighe et al., 1996 (49)        | Acridine orange leukocyte cytospin                       | NR                          | 14.0          | 2                      | 0              | 43            | 5              |
| Baum et al., 1998 (87)         | Acridine orange leukocyte cytospin                       | Short term                  | 28.5          | 2                      | 2              | 8             | 2              |
| Kite et al., 1999 (37)         | Acridine orange leukocyte cytospin and Gram stain        | Short and long term         | 44.6          | 48                     | 5              | 57            | 2              |
| Bong et al., 2003 (88)         | Acridine orange leukocyte cytospin                       | Short term                  | 20.0          | 10                     | 4              | 36            | 0              |

\* IVD = intravascular device; NR = not reported.

† Indeterminate test results were not included in calculation of the test performance.

‡ Isolator system (Wampole Laboratories, Cranbury, New Jersey).

Table 2—Continued (bottom right)

| Sensitivity,<br>% | Specificity,<br>% | Positive<br>Predictive<br>Value,<br>% | Negative<br>Predictive<br>Value,<br>% | Indeterminate<br>Test Results,<br>n/nt |
|-------------------|-------------------|---------------------------------------|---------------------------------------|----------------------------------------|
| 73                | 83                | 11                                    | 83                                    | NR                                     |
| 93                | 75                | 11                                    | 99                                    | NR                                     |
| 93                | 100               | 100                                   | 99                                    | NR                                     |
| 80                | 94                | 100                                   | 98                                    | NR                                     |
| 40                | 92                | 20                                    | 96                                    | NR                                     |
| 88                | 86                | 16                                    | 99                                    | NR                                     |
| 100               | 68                | 55                                    | 100                                   | NR                                     |
| 84                | 70                | 84                                    | 70                                    | NR                                     |
| 100               | 84                | 30                                    | 10                                    | NR                                     |
| 100               | 89                | 62                                    | 100                                   | NR                                     |
| 100               | 92                | 44                                    | 100                                   | NR                                     |
| 80                | 84                | 66                                    | 91                                    | NR                                     |
| 20                | 95                | 16                                    | 95                                    | NR                                     |
| 100               | 96                | 64                                    | 100                                   | NR                                     |
| 82                | 99                | 93                                    | 96                                    | NR                                     |
| 80                | 100               | 100                                   | 98                                    | NR                                     |
| 79                | 64                | 79                                    | 69                                    | NR                                     |
| 96                | 91                | 88                                    | 97                                    | NR                                     |
| 100               | 100               | 100                                   | 100                                   | 1/13                                   |
| 73                | 98                | 99                                    | 56                                    | NR                                     |
| 100               | 100               | 100                                   | 100                                   | NR                                     |
| 83                | 100               | 100                                   | 78                                    | NR                                     |
| 100               | 100               | 100                                   | 100                                   | NR                                     |
| 47                | 89                | 63                                    | 80                                    | NR                                     |
| 95                | 97                | 87                                    | 98                                    | NR                                     |
| 94                | 100               | 100                                   | 98                                    | NR                                     |
| 100               | 100               | 100                                   | 100                                   | NR                                     |
| 80                | 100               | 100                                   | 98                                    | NR                                     |
| 94                | 99                | 94                                    | 91                                    | 19/93                                  |
| 77                | 54                | 48                                    | 54                                    | 0                                      |
| 93                | 90                | 96                                    | 82                                    | NR                                     |
| 67                | 43                | 33                                    | 75                                    | 25/37                                  |
| 96                | 100               | 100                                   | 93                                    | 22/64                                  |
| 89                | 100               | 100                                   | 96                                    | 24/57                                  |
| 73                | 71                | 68                                    | 75                                    | 0                                      |
| 81                | 92                | 91                                    | 84                                    | 5947/6138                              |
| 93                | 75                | 86                                    | 87                                    | 5947/6138                              |
| 82                | 86                | 81                                    | 86                                    | NR                                     |
| 87                | 94                | 87                                    | 93                                    | NR                                     |
| 29                | 100               | 100                                   | 89                                    | NR                                     |
| 50                | 80                | 50                                    | 80                                    | NR                                     |
| 96                | 92                | 90                                    | 96                                    | 0                                      |
| 100               | 90                | 71                                    | 100                                   | NR                                     |
